# Supplementary material for: Identification of novel transcriptional regulators involved in macrophage differentiation and activation in U937 cells
Source: BMC Immunol. 2009 Apr 2;10:18. doi: 10.1186/1471-2172-10-18 (PMC2674038; doi:10.1186/1471-2172-10-18)
Supplement: Additional file 1 — Correlation coefficients calculated from microarray experiments (Illumina). Each of biological replicates (A and B) and technical replicates (A1 and A2) were represented onto separate BeadChip slides (Slide 1, 2, 3) and hybridized with untreated U937 cells, PMA 6 hrs, 12 hrs, 24 hrs, 32 hrs, LPS and VitD3 samples. [file 1471-2172-10-18-S1.xls]

## Sheet: Sheet1
Additional file 1
Correlation coefficients resulted from Illumina cRNA hybridization array.
		Slide#3 (B)							Slide#2 (A)
		Control	PMA 6	PMA 12	PMA 24	PMA 32	LPS	VitD3	Control	PMA 6	PMA 12	PMA 24	PMA 32	LPS	VitD3
Slide	Conrol	0.976							0.997
#1 (A)	PMA 6		0.985							0.993
	PMA 12			0.985							0.993
	PMA 24				0.989							0.997
	PMA 32					0.991							0.998
	LPS						0.987							0.993
	VitD3							0.979							0.993
Slide	Control	0.979								0.961	0.937	0.925	0.919	0.887	0.982
#2 (A)	PMA 6		0.994
	PMA12			0.993
	PMA 24				0.993
	PMA 32					0.991
	LPS						0.998
	VitD3							0.978
* Biological replicates (A and B) and technical replicates (A1 and A2) were represented onto different BeadChip slides (Slide 1, 2, 3) hybridized with untreated U937 cells, PMA 6, 12, 24, 36hrs, LPS and VitD3 samples.
